# Supplementary material
Source: PubMed Central journal article supplement (PMC8608148)
Supplement: NIHMS1748803-supplement-1.pdf [file NIHMS1748803-supplement-1.pdf]

**Neuron, Volume 102**

**Supplemental Information**

**p190RhoGAP Filters Competing Signals  
to Resolve Axon Guidance Conflicts**

**Dario Bonanomi, Fabiola Valenza, Onanong Chivatakarn, Matthew J. Sternfeld, Shawn P. Driscoll, Aaron Aslanian, Karen Lettieri, Miriam Gullo, Aurora Badaloni, Joseph W. Lewcock, Tony Hunter, and Samuel L. Pfaff**

**Table S1. Pathway annotation for p190 interactors (unsupervised) [Related to Figures 5 and S5]**

| Pathway ID    | Database | Pathway    | NE | Tot NE | NER   | fold enrich | pValue   | Annotated Entities                                                                           |
|---------------|----------|------------|----|--------|-------|-------------|----------|----------------------------------------------------------------------------------------------|
| R-HAS-400685  | Reactome | Sema4D     | 4  | 494    | 37681 | 10.17       | 0.0361   | Arhgap35,Rock2,Rac1,Rhoa                                                                     |
| R-HAS-8875878 | Reactome | MET        | 6  | 494    | 37681 | 10.17       | 0.0113   | Col2a1,Col1a2,Col1a1,Fn1,Grb2,Rac1                                                           |
| R-HSA-373752  | Reactome | Netrin-1   | 7  | 494    | 37681 | 9.05        | 0.0117   | Ablim1,Mapk8,Plcg1,Rac1,Ezr,Rgma,Cdc42                                                       |
| R-HSA-419037  | Reactome | NCAM1      | 5  | 494    | 37681 | 8.67        | 0.0362   | Col2a1,Col9a2,Ncam1,Gfra1,Agrn                                                               |
| P00047        | Panther  | PDGF       | 10 | 494    | 37681 | 7.41        | 1.09E-06 | Rasal1,Gsk3b,Itpr3,Raf1,Grb2,Nin,Mapk8,Vav3,Ikbkap,Plcg1                                     |
| 4310          | KEGG     | Wnt        | 14 | 494    | 37681 | 7.12        | 1.30E-08 | Csnk1e,Ppp2r5d,Cacybp,Ppp2r5b,Ppp3ca,Apc,Rhoa,Gsk3b,Mapk8,Ppp3r1,Rock2,Prickle2,Csnk2a1,Rac1 |
| R-HSA-373760  | Reactome | L1CAM      | 12 | 494    | 37681 | 7.10        | 0.0078   | Shtn1,Dlg1,Ap2a1,Rdx,Dcx,Ncam1,Nrcam,Rac1,Csnk2a1,Ank2,Ezr,L1cam                             |
| P00034        | Panther  | Integrin   | 12 | 494    | 37681 | 6.99        | 1.75E-07 | Rac1,Arpc5l,Raf1,Grb2,Col18a1,Col2a1,Rhoa,Cdc42,Col1a1,Elmo2,Col1a2                          |
| R-HSA-2682334 | Reactome | EPH-Ephrin | 9  | 494    | 37681 | 6.80        | 0.0251   | Itsn1,Vav3,Ap2a1,Rasa1,Rock2,Rac1,Git1,Rhoa,Cdc42                                            |
| P00018        | Panther  | EGF        | 6  | 494    | 37681 | 4.92        | 0.0014   | Rasal1,Rac1,Raf1,Grb2,Plcg1,Nf1                                                              |
| 4062          | KEGG     | Chemokine  | 11 | 494    | 37681 | 4.74        | 2.44E-05 | Gnai1,Rhoa,Vav3,Cdc42,Gsk3b,Gnb4,Raf1,Grb2,Ikbkb,Rock2,Rac1                                  |
| P0002         | Panther  | FGF        | 5  | 494    | 37681 | 4.24        | 0.0067   | Rasal1,Rac1,Raf1,Grb2,Plcg1                                                                  |
| 4010          | KEGG     | MAPK       | 13 | 494    | 37681 | 3.77        | 5.09E-05 | Ppp3ca,Cdc42,Raf1,Grb2,Ikbkb,Nf1,Cacna2d3,Mapk8,Ppp3r1,Rasa1,Mapt,Rac1,Cacna2d1              |

Legend:

NE = Number of annotated entities in the input list

Tot NE = Total number of mapped entities in the input list

NER = Number of annotated entities in the reference list

Tot NER = Total number of entities in the reference list

**Table S2. Additional p190 interactors annotated in Netrin-1 pathway (manually curated) [Related to Figures 5 and S5]**

| <b>Genes</b> | <b># spectra p190 IP/MS</b> | <b># spectra IgG IP/MS</b> | <b>References</b>                                                                                                            |
|--------------|-----------------------------|----------------------------|------------------------------------------------------------------------------------------------------------------------------|
| Rasa1        | 846                         | 0                          | Antoine-Bertrand et al., 2016 doi: 10.1074/jbc.M115.674846                                                                   |
| Akap2        | 58                          | 0                          | Deming et al, 2015 doi: 10.1074/jbc.M114.628644                                                                              |
| Akap9        | 5                           | 0                          | Deming et al, 2015 doi: 10.1074/jbc.M114.628644                                                                              |
| SHTN1        | 5                           | 0                          | Toriyama et al., 2013 doi: 10.1016/j.cub.2013.02.017                                                                         |
| Wasf1        | 3                           | 0                          | Bernadskaya et al., 2012 doi: 10.1371/journal.pgen.1002863; Chen et al., 2014 doi: 10.1016/j.cell.2013.11.048                |
| Cyfip1       | 3                           | 0                          | Bernadskaya et al., 2012 doi: 10.1371/journal.pgen.1002863; Chen et al., 2014 doi: 10.1016/j.cell.2013.11.048                |
| Abi1         | 2                           | 0                          | Xu et al., 2012 doi: 10.1371/journal.pgen.1003054                                                                            |
| Abl2         | 2                           | 0                          | O'Donnell et al., 2013 doi: 10.1242/dev.093831                                                                               |
| Elmo2        | 2                           | 0                          | Li at al., 2008 doi:10.1038/nn2022                                                                                           |
| Evl          | 2                           | 0                          | Gitai et al., 2003 <a href="https://doi.org/10.1016/S0896-6273(02)01149-2">https://doi.org/10.1016/S0896-6273(02)01149-2</a> |
| Raph1        | 2                           | 0                          | Stavoe et al., 2012 doi: 10.1101/gad.193409.112                                                                              |
| Trim67       | 2                           | 0                          | Winkle et al., 2014 doi: 10.1083/jcb.201311003 (by similarity with TRIM9)                                                    |
