# Supplementary material
Source: PubMed Central journal article supplement (PMC8608148)

**Figure S3**

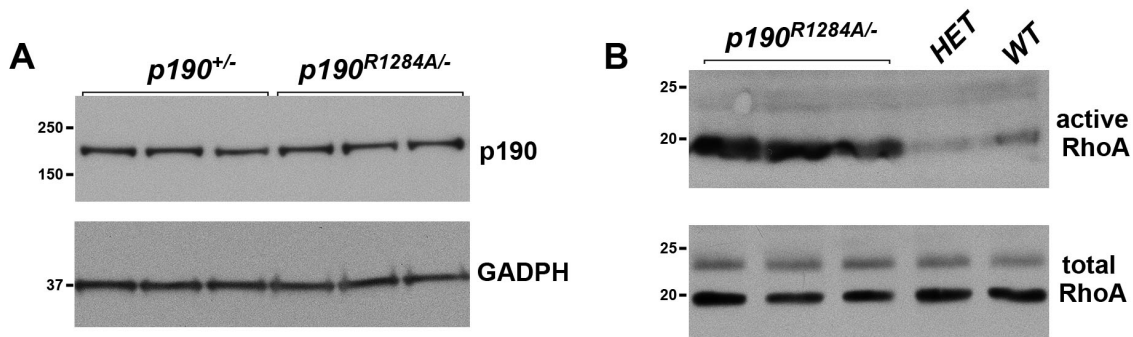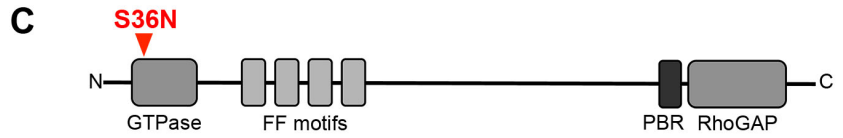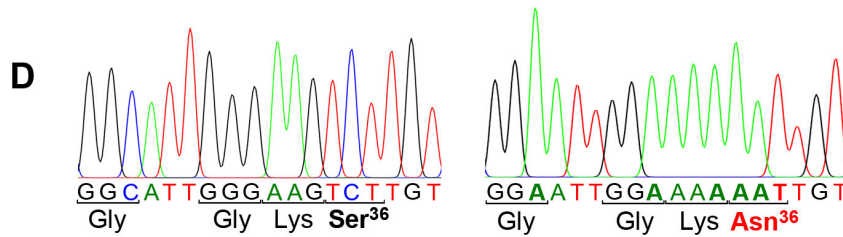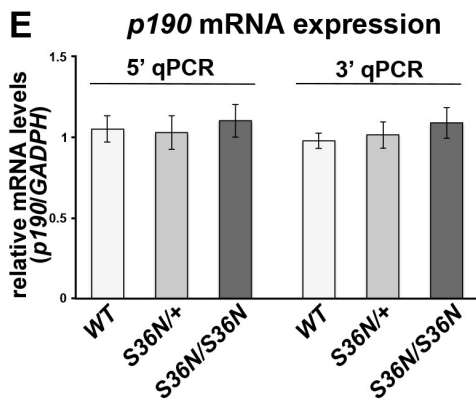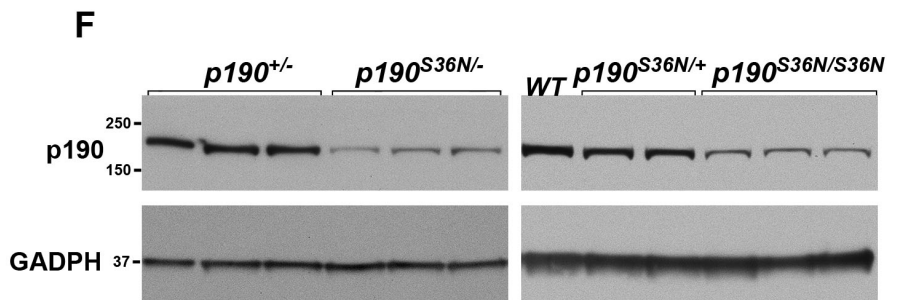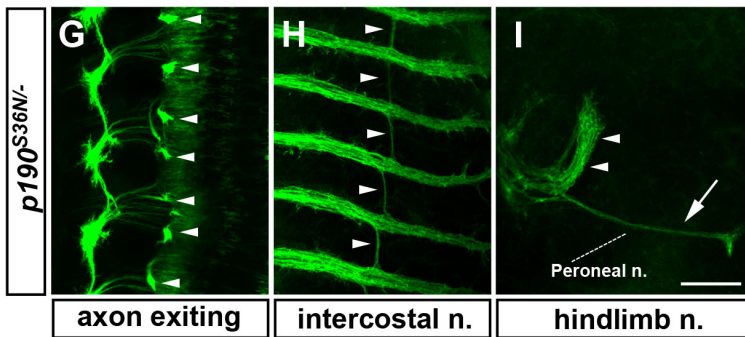

**J** ectopic motor axon bundles

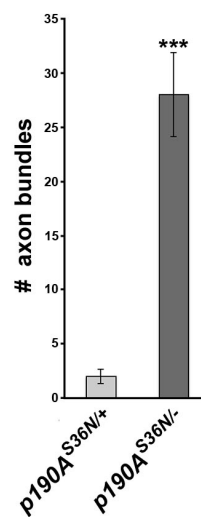

**K** Normal Moderate Severe

intercostal n. phenotype limb n. phenotype

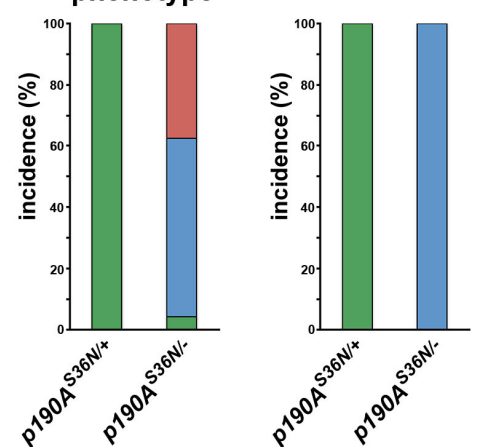

Supplement: NIHMS1748803-supplement-Figure_S3.pdf [file NIHMS1748803-supplement-Figure_S3.pdf]
