# Supplementary material
Source: PubMed Central journal article supplement (PMC8608148)

Figure S1

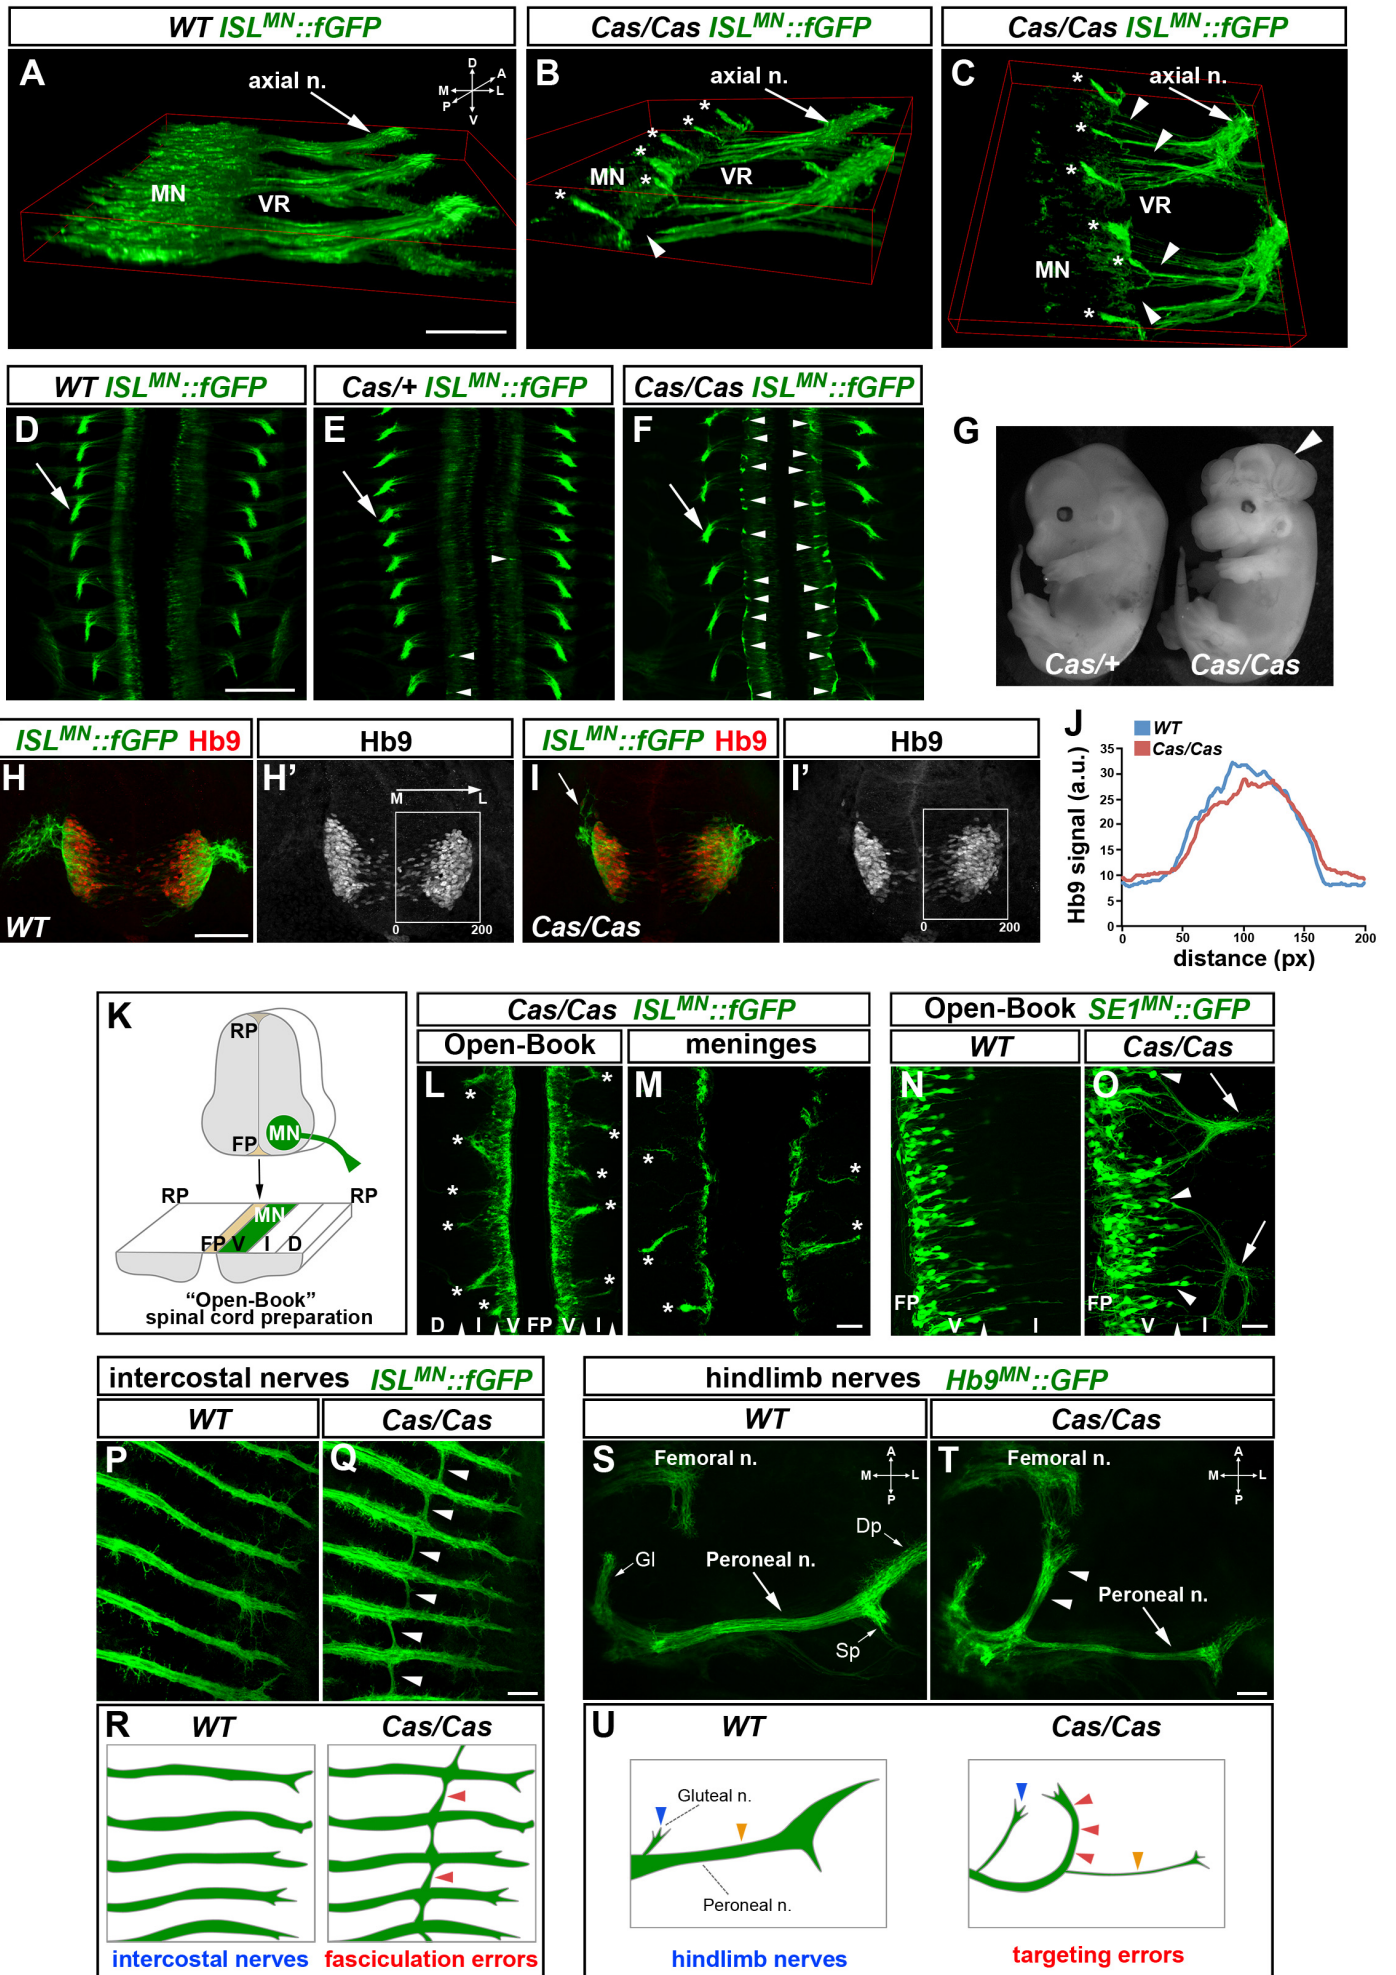

Supplement: NIHMS1748803-supplement-Figure_S1.pdf [file NIHMS1748803-supplement-Figure_S1.pdf]

Figure S2

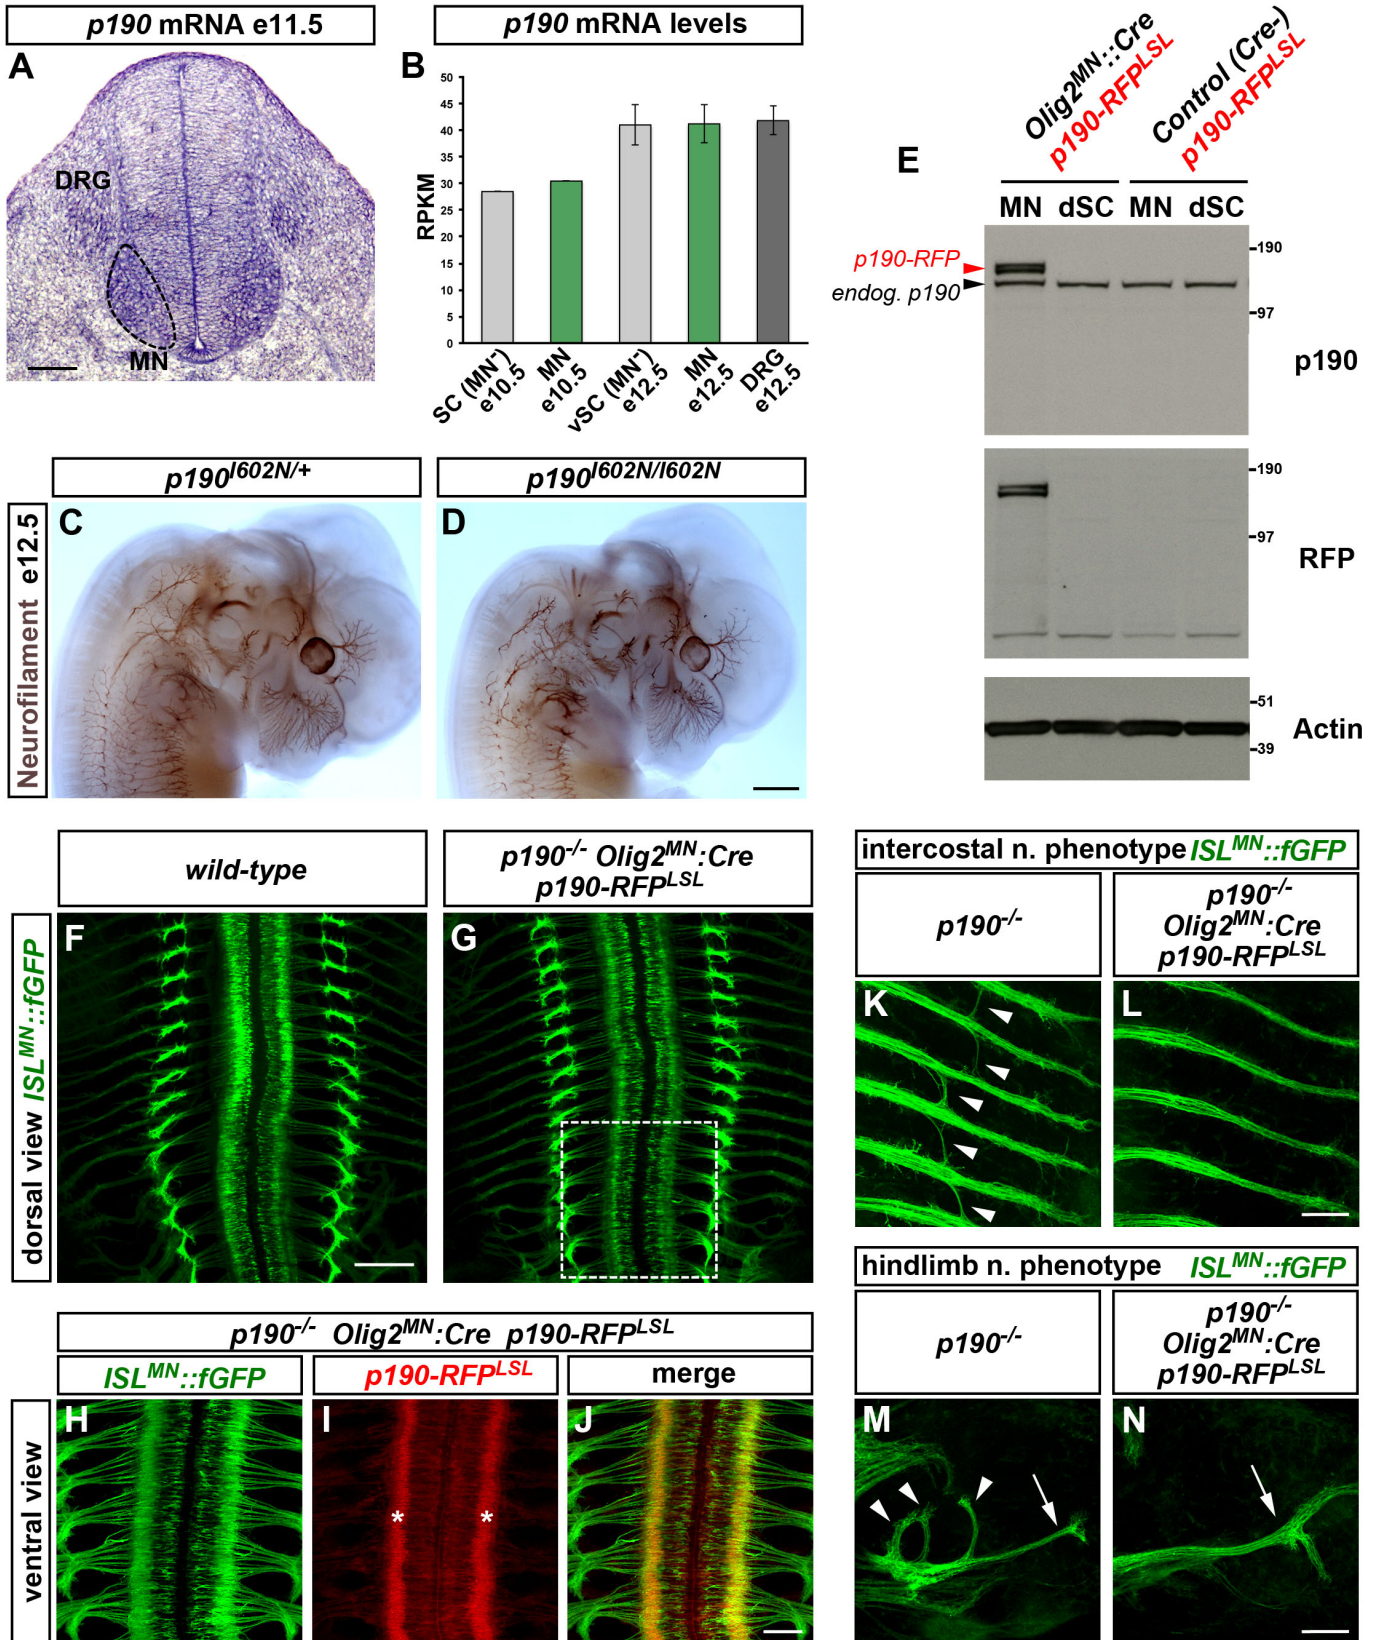

Supplement: NIHMS1748803-supplement-Figure_S2.pdf [file NIHMS1748803-supplement-Figure_S2.pdf]

**Figure S4**

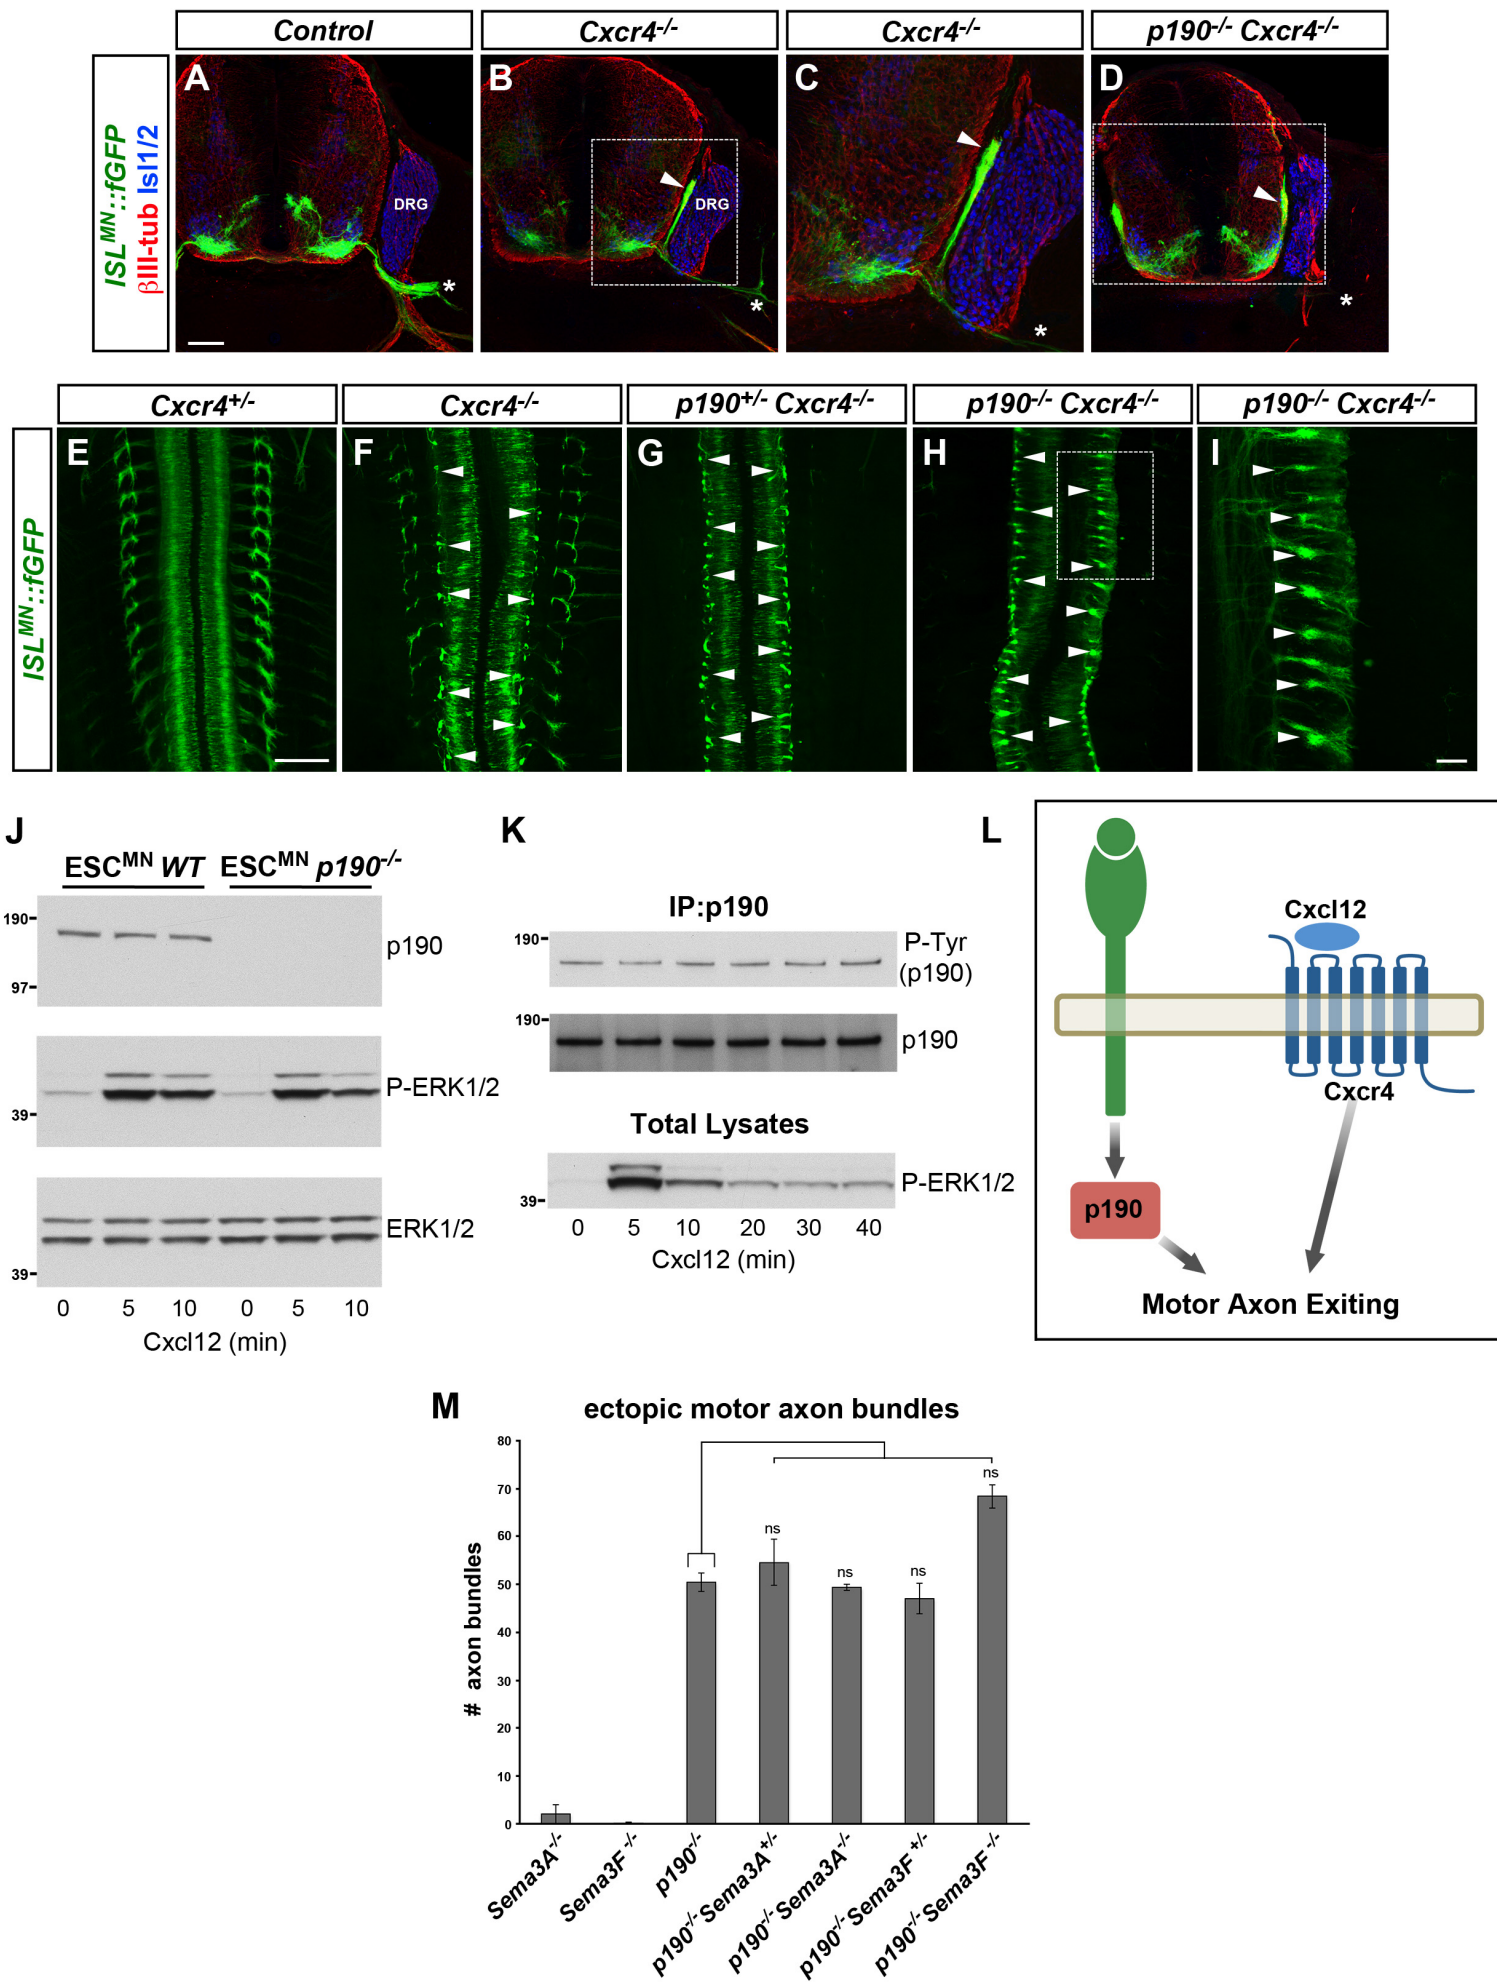

Supplement: NIHMS1748803-supplement-Figure_S4.pdf [file NIHMS1748803-supplement-Figure_S4.pdf]

**Figure S5**

**A**

Differential gene expression in *p190*<sup>-/-</sup> motor neurons

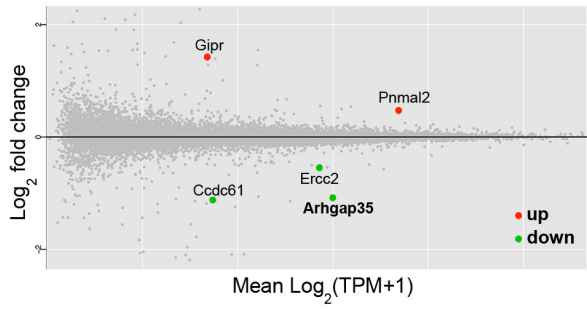

**B**

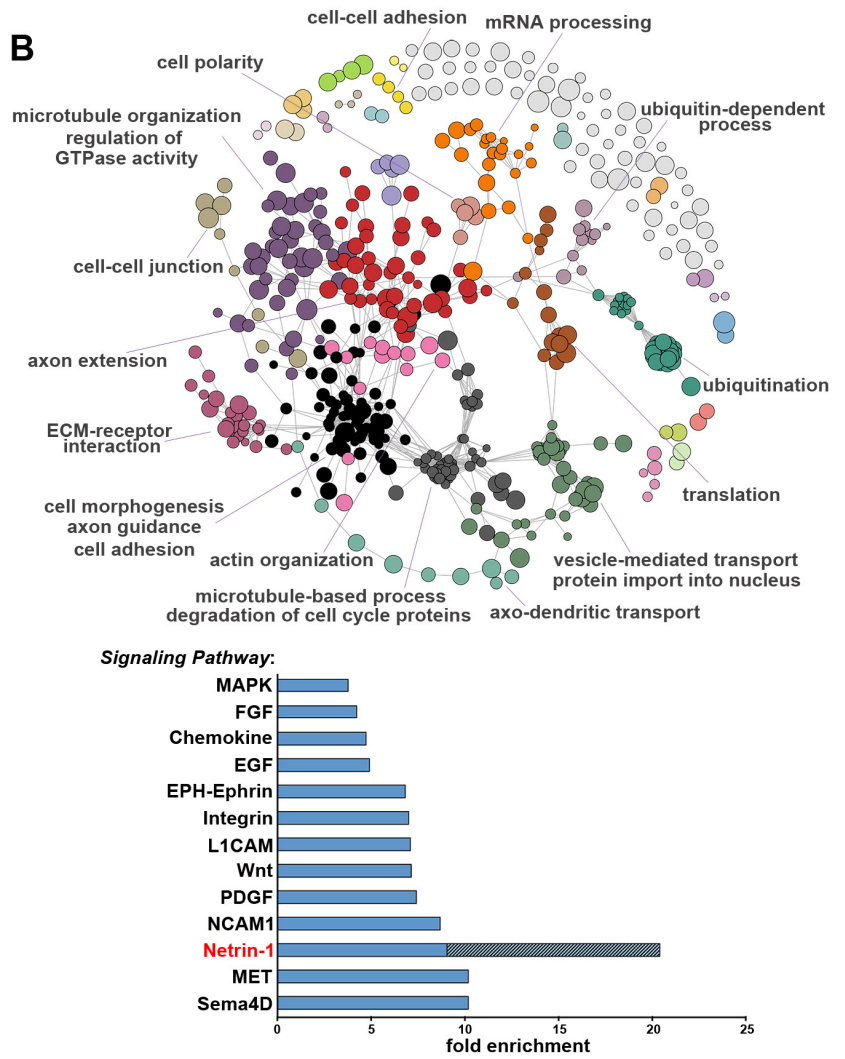

**C**

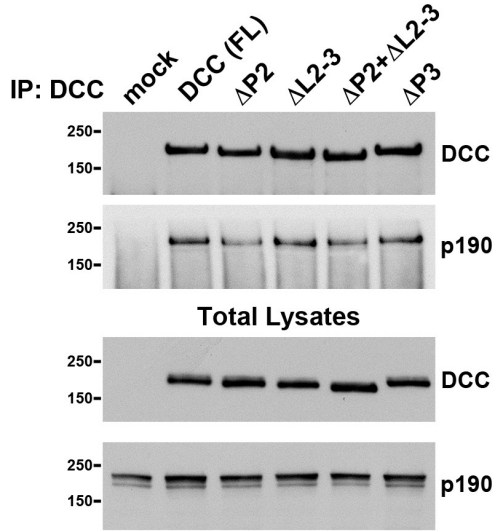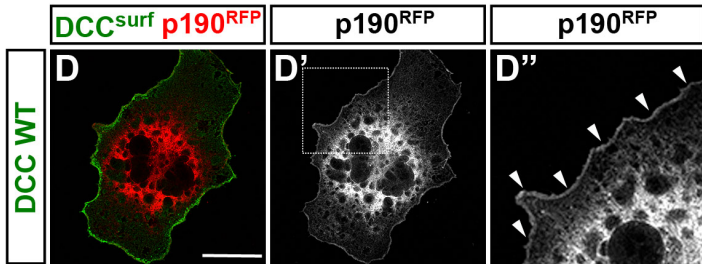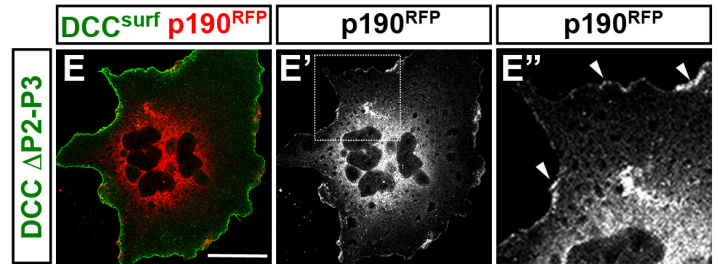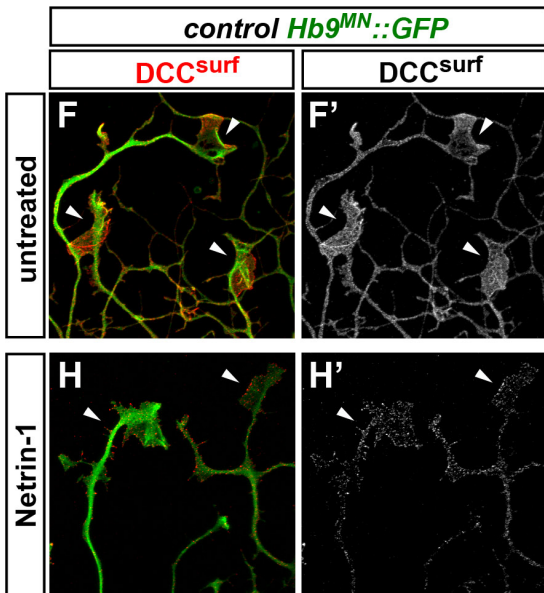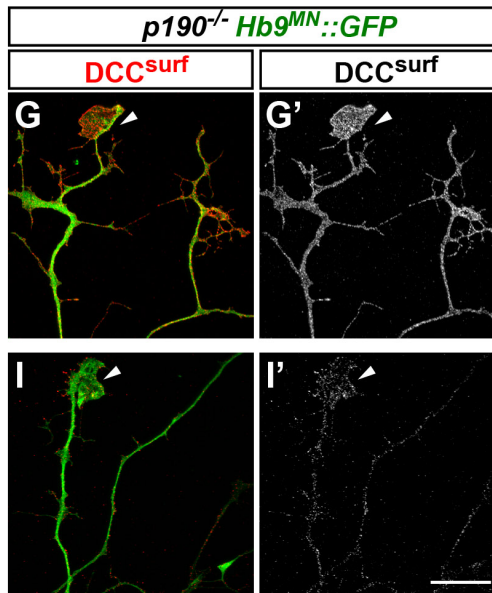

**J**

DCC on axon surface

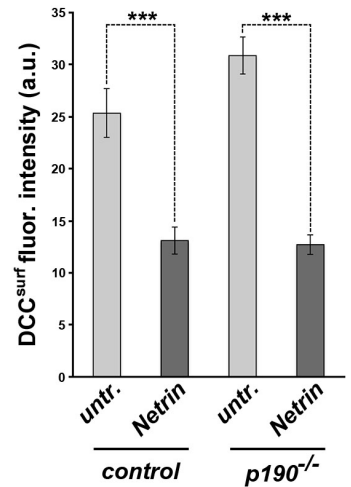

Supplement: NIHMS1748803-supplement-Figure_S5.pdf [file NIHMS1748803-supplement-Figure_S5.pdf]

Figure S6

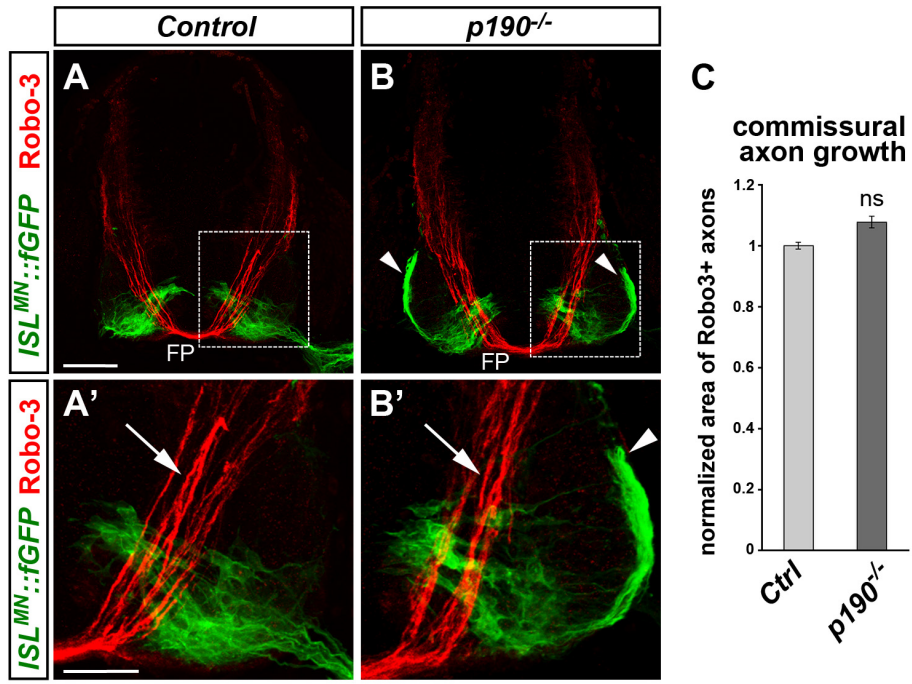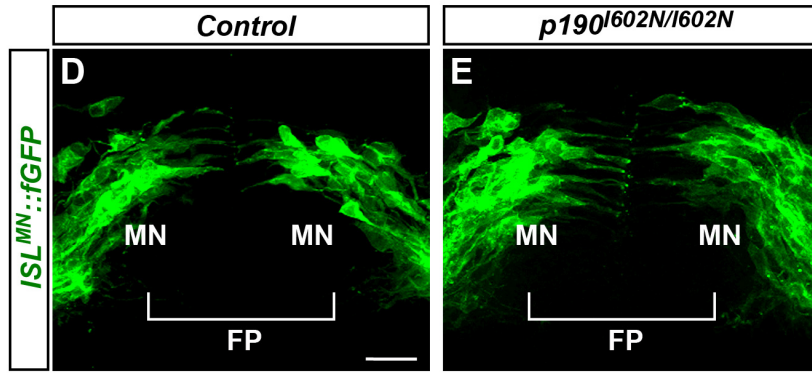

Floor Plate-induced axon repulsion

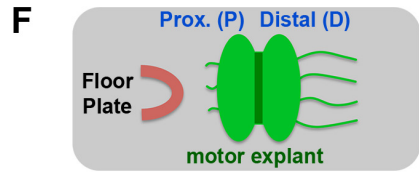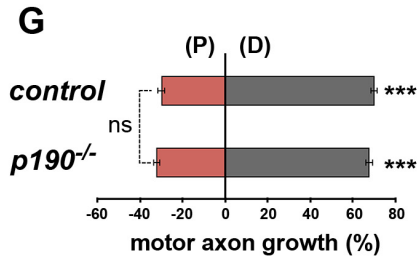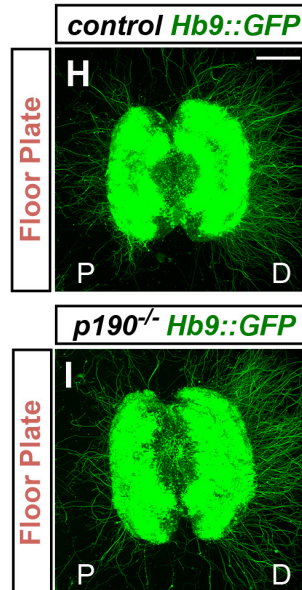

Supplement: NIHMS1748803-supplement-Figure_S6.pdf [file NIHMS1748803-supplement-Figure_S6.pdf]

Figure S7

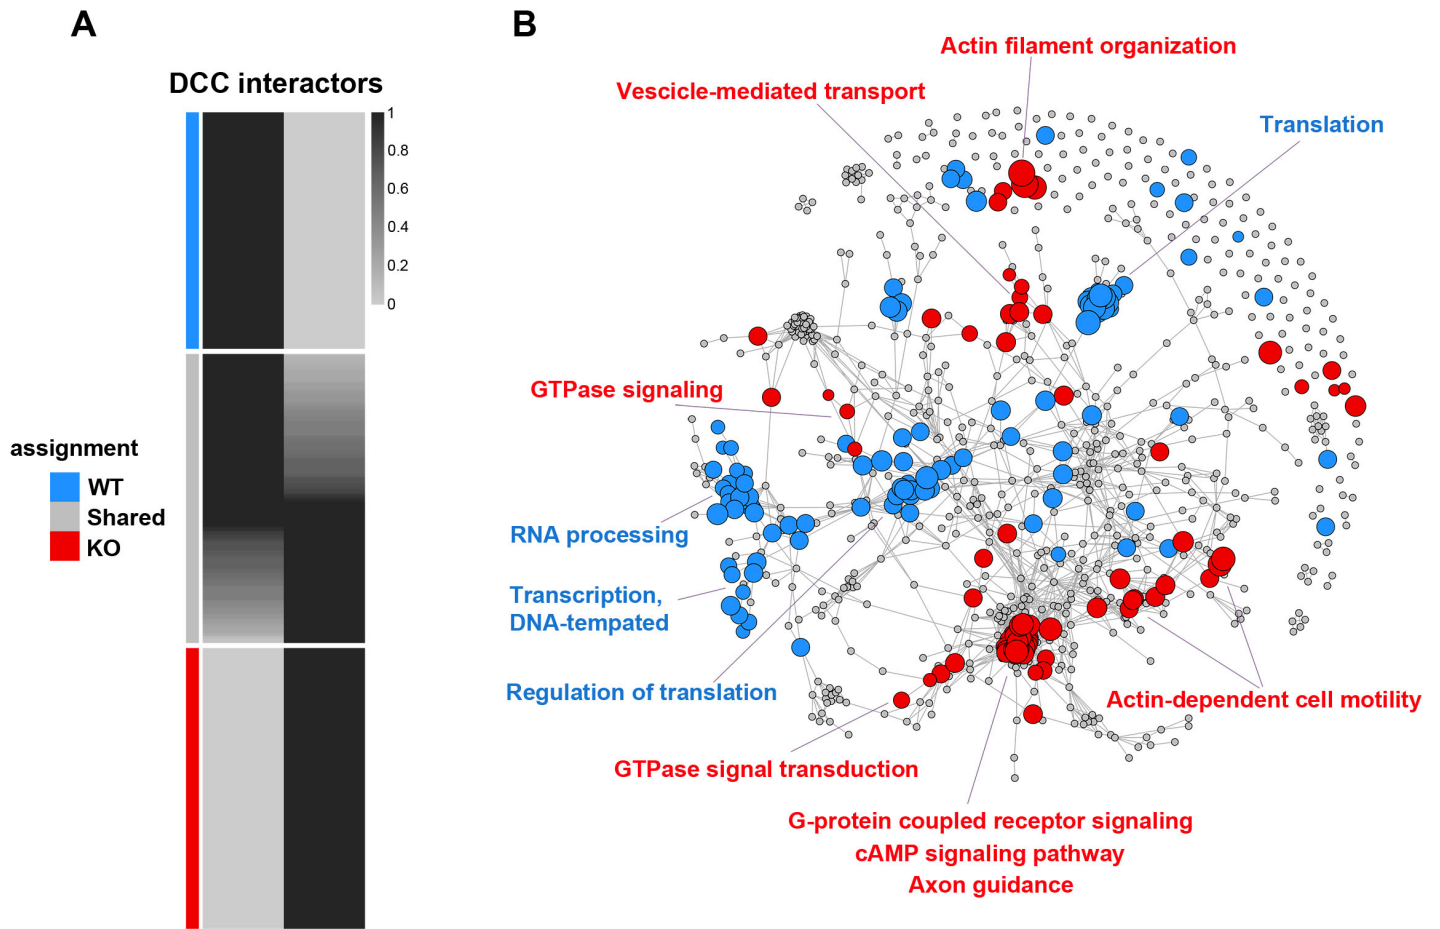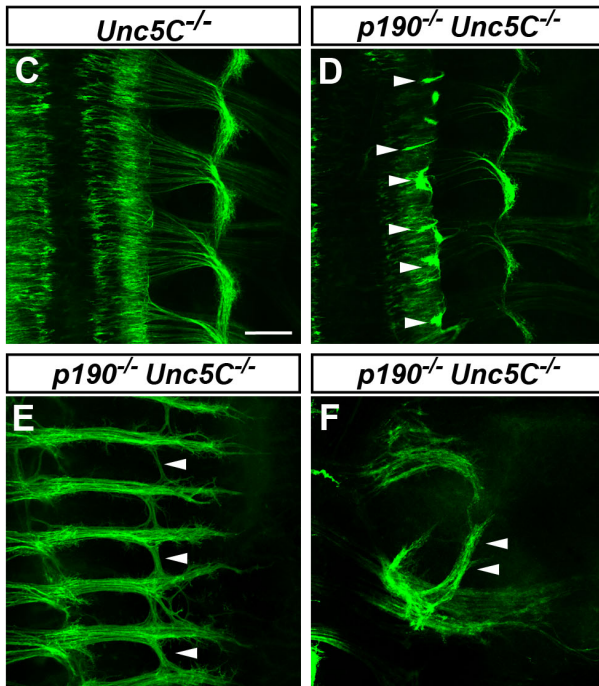

**G** ectopic motor axon bundles

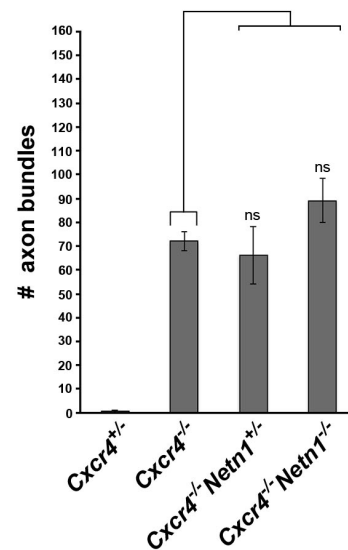

Supplement: NIHMS1748803-supplement-Figure_S7.pdf [file NIHMS1748803-supplement-Figure_S7.pdf]
